# Supplementary material for: Cognitive Development of Infants Exposed to the Zika Virus in Puerto Rico
Source: PubMed Central journal article supplement (PMC6822087; doi:10.1001/jamanetworkopen.2019.14061), 2019-10-25
Supplement: jamanetwopen-2-e1914061-s001.pdf [file jamanetwopen-2-e1914061-s001.pdf]

## Supplementary Online Content

Valdes V, Zorrilla CD, Gabard-Durnam, L, et al. Cognitive development of infants exposed to the Zika virus in Puerto Rico. *JAMA Netw Open*. 2019;2(10):e1914061. doi:10.1001/jamanetworkopen.2019.14061

**eTable 1.** Associations Between ZIKV, Receptive Language, and Selected Covariates  
**eFigure.** Association Between Hurricane Maria Impact and Receptive Language Scores  
**eTable 2.** Multivariate Regression Model: Interaction Between Hurricane Impact and ZIKV on Receptive Language Scores, Adjusting for Covariates

This supplementary material has been provided by the authors to give readers additional information about their work.

**eTable 1.** Associations Between ZIKV, Receptive Language, and Selected Covariates

|                                                                                              | ZIKV status<br>(negative/positive)    | Receptive language t-<br>scores |
|----------------------------------------------------------------------------------------------|---------------------------------------|---------------------------------|
| ZIKV status (negative/positive)                                                              | --                                    | --                              |
| Receptive language t-scores                                                                  | F = 4.40*                             | --                              |
| Maternal education (less than high school, high school/GED, associate's, bachelor or higher) | $\chi^2 = 2.23$<br>Cramer's V = 0.19  | Rho = 0.09                      |
| Paternal education (less than high school, high school/GED, associate's, bachelor or higher) | $\chi^2 = 2.50$<br>Cramer's V = 0.20  | Rho = 0.02                      |
| Maternal employment (fulltime, part-time, unemployed/housework)                              | $\chi^2 = 6.72$<br>Cramer's V = 0.32* | Rho = 0.05                      |
| Paternal employment (fulltime, part-time, unemployed/housework)                              | $\chi^2 = 0.28$<br>Cramer's V = 0.07  | Rho = -0.24                     |
| Home status (owned, rented, occupied for free, public housing)                               | $\chi^2 = 6.02$<br>Cramer's V = 0.30  | Rho = -0.06                     |
| Household size (number of people living in household)                                        | F = 0.004                             | r = 0.14                        |
| Annual income (ordinal from low to high)                                                     | F = 0.17                              | Rho = 0.07                      |
| Hours in non-parental care                                                                   | F = 2.01                              | r = -0.23                       |
| Maternal anxiety                                                                             | F = 0.70                              | r = 0.15                        |
| Maternal depression (EPDS)                                                                   | F = 0.37                              | r = -0.05                       |
| Maternal depression (PHQ)                                                                    | F = 1.71                              | r = 0.13                        |
| Maternal perceived stress                                                                    | F = 2.89                              | r = 0.17                        |
| Days without electricity                                                                     | F = 0.20                              | r = -0.02                       |
| Days without water                                                                           | F = 0.03                              | r = -0.28*                      |
| Days without cell service                                                                    | F = 0.44                              | r = -0.15                       |

\*p < 0.05, two-tailed

eFigure. Association Between Hurricane Maria Impact and Receptive Language Scores

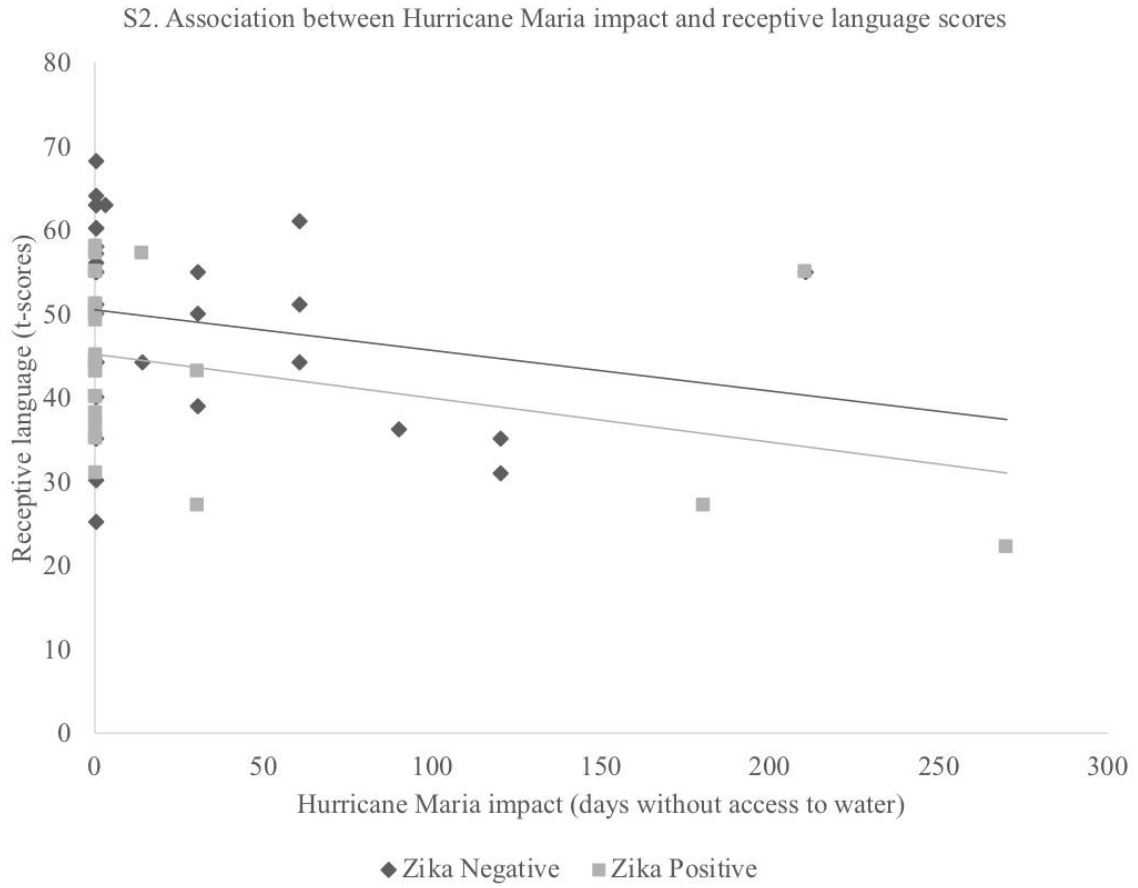

**eTable 2.** Multivariate Regression Model: Interaction Between Hurricane Impact and ZIKV on Receptive Language Scores, Adjusting For Covariates (n = 65)

|                                                                 | Unstandardized coefficients (standard error) | Standardized coefficients | 95% Confidence interval | P-value |
|-----------------------------------------------------------------|----------------------------------------------|---------------------------|-------------------------|---------|
| Infant birthweight (in lbs)                                     | 0.91 (1.22)                                  | 0.10                      | -1.54, 3.36             | 0.46    |
| Infant sex (male/female)                                        | -1.13 (2.79)                                 | -0.05                     | -6.72, 4.46             | 0.69    |
| Infant race (white/black)                                       | -3.46 (3.96)                                 | -0.12                     | -11.39, 4.48            | 0.39    |
| Infant ethnicity (Puerto Rican/Dominican)                       | 4.65 (11.32)                                 | 0.05                      | -18.04, 27.33           | 0.68    |
| Infant age (in months)                                          | -0.82 (0.43)                                 | -0.24                     | -1.68, 0.04             | 0.06    |
| Primary language (Spanish, bilingual)                           | 2.81 (4.95)                                  | 0.07                      | -7.12, 12.74            | 0.57    |
| Mother's employment (fulltime, part-time, unemployed/housework) | 0.48 (1.64)                                  | 0.04                      | -2.81, 3.77             | 0.77    |
| Hurricane impact (days without water)                           | -0.05 (0.04)                                 | -0.24                     | -0.12, 0.03             | 0.25    |
| Zika status (negative/positive)                                 | -5.70 (2.68)*                                | -0.26                     | -11.07, -0.32           | 0.04    |
| Hurricane impact x zika status                                  | -0.01 (0.05)                                 | -0.05                     | -0.11, 0.09             | 0.83    |
| Constant                                                        | 45.36 (19.83)                                |                           |                         |         |
| R2                                                              | 0.22                                         |                           |                         |         |
| Adjusted R2                                                     | 0.08                                         |                           |                         |         |
| df for model F                                                  | 9                                            |                           |                         |         |
| F                                                               | 1.52                                         |                           |                         |         |

\*p < 0.05, two-tailed
